# Supplementary material for: SARS-CoV-2 Antigen Detection to Expand Testing Capacity for COVID-19: Results from a Hospital Emergency Department Testing Site
Source: MDPI journal article supplement (doi:10.3390/diagnostics11071211), 2021-07-05
Supplement: s1 [file s1]

**Table S1** Anticipated NPV and PPV with their 95% CI at indicated COVID-19 prevalence using the STANDARD F COVID-19 Ag FIA assay<sup>a</sup>

| Prevalence (%) | COVID-19 area           |                         | Non-COVID-19 area       |                         |
|----------------|-------------------------|-------------------------|-------------------------|-------------------------|
|                | PPV% (95% CI)           | NPV% (95% CI)           | PPV% (95% CI)           | NPV% (95% CI)           |
| 0.5            | 17.1 (11.0–25.7)        | 99.8 (99.8–99.9)        | 7.21 (4.72–10.9)        | 99.7 (99.6–99.8)        |
| 1              | 29.4 (19.9–41.0)        | 99.7 (99.6–99.7)        | 13.5 (9.1–19.7)         | 99.4 (99.2–99.5)        |
| 2              | 45.7 (33.5–58.4)        | 99.3 (99.2–99.5)        | <b>24.0 (16.8–33.1)</b> | <b>98.8 (98.5–99.1)</b> |
| 10             | <b>82.1 (73.3–88.4)</b> | <b>96.5 (95.7–97.2)</b> | 63.2 (52.3–72.9)        | 93.8 (92.1–95.1)        |
| 25             | 93.2 (89.2–95.8)        | 90.2 (88.1–92.0)        | 83.7 (76.7–89.0)        | 83.4 (79.6–86.6)        |
| 40             | 96.5 (94.3–97.9)        | 82.2 (78.8–85.1)        | 91.2 (86.8–94.2)        | 71.5 (66.1–76.4)        |
| 80             | 99.4 (99.0–99.6)        | 43.4 (38.2–48.8)        | 98.4 (97.5–99.0)        | 29.5 (24.5–35.0)        |

Abbreviations: CI, confidence interval; COVID-19, coronavirus disease 2019; FIA, fluorescent immunoassay; NPV, negative predictive value; PPV, positive predictive value.

<sup>a</sup>Bold indicates values that mirrored those actually observed in the COVID-19 area (pre-test probability, 16.2%) and in the non-COVID-19 area (pre-test probability, 3.7%), respectively.
