# Supplementary material for: SARS-CoV-2 Antigen Detection to Expand Testing Capacity for COVID-19: Results from a Hospital Emergency Department Testing Site
Source: Diagnostics (Basel). 2021 Jul 5;11(7):1211. doi: 10.3390/diagnostics11071211 (PMC8304665; doi:10.3390/diagnostics11071211)
Supplement: Supplementary file 1 [file diagnostics-11-01211-s001.zip]

Archive with 4 entries (4 files):
- FIGURE_S1.tif
- FIGURE_S2.tif
- FIGURE_S3.tif
- Supplementary_Table_1.pdf
